# Supplementary material for: Major QTL for Seven Yield-Related Traits in Common Wheat (Triticum aestivum L.)
Source: Front Genet. 2020 Aug 28;11:1012. doi: 10.3389/fgene.2020.01012 (PMC7485215; doi:10.3389/fgene.2020.01012)
Supplement: TABLE S1 — Predicated genes in the interval of the major QTL QFlw.hebau-2D. [file Table_1.XLSX]

## Sheet: Sheet1
Table S1 Predicated genes in the interval of the major QTL QFlw.hebau-2D
Gene ID in CS	Annotation
TraesCS2D01G528300	(RAP Annotation release2) Conserved hypothetical protein
TraesCS2D01G519600	14 kDa proline-rich protein DC2.15, putative
TraesCS2D01G541600	2-aminoethanethiol dioxygenase
TraesCS2D01G490800	2-oxoglutarate (2OG) and Fe(II)-dependent oxygenase superfamily protein
TraesCS2D01G521300	2-oxoglutarate (2OG) and Fe(II)-dependent oxygenase superfamily protein
TraesCS2D01G539400	2-oxoglutarate (2OG) and Fe(II)-dependent oxygenase superfamily protein
TraesCS2D01G539600	2-oxoglutarate (2OG) and Fe(II)-dependent oxygenase superfamily protein
TraesCS2D01G495000	30S ribosomal protein S15
TraesCS2D01G557000	30S ribosomal protein S4, chloroplastic
TraesCS2D01G502200	3-isopropylmalate dehydratase large subunit
TraesCS2D01G508000	3-ketoacyl-CoA synthase
TraesCS2D01G508200	3-ketoacyl-CoA synthase
TraesCS2D01G508300	3-ketoacyl-CoA synthase
TraesCS2D01G530800	3-ketosteroid-9-alpha-monooxygenase, oxygenase component
TraesCS2D01G521400	3-oxoacyl-[acyl-carrier-protein] synthase 3
TraesCS2D01G531000	3-oxoacyl-reductase
TraesCS2D01G513500	4-hydroxy-tetrahydrodipicolinate synthase
TraesCS2D01G546300	50S ribosomal protein L14
TraesCS2D01G523100	ABC transporter ATP-binding protein
TraesCS2D01G556000	Acetyl-coenzyme A synthetase
TraesCS2D01G556100	Acetyl-coenzyme A synthetase
TraesCS2D01G556500	Acetyl-coenzyme A synthetase
TraesCS2D01G556600	Acetyl-coenzyme A synthetase
TraesCS2D01G557900	Acetyl-coenzyme A synthetase
TraesCS2D01G541300	Actin-related family protein
TraesCS2D01G557800	Acyl-[acyl-carrier-protein] hydrolase
TraesCS2D01G527200	acyl-CoA binding protein 5
TraesCS2D01G544200	Acyl-protein thioesterase 1
TraesCS2D01G544300	Acyl-protein thioesterase 1
TraesCS2D01G544600	Acyl-protein thioesterase 1
TraesCS2D01G502700	Adenine nucleotide alpha hydrolases-like superfamily protein
TraesCS2D01G499300	Adenosylcobinamide-GDP ribazoletransferase
TraesCS2D01G489900	Adenosylhomocysteinase
TraesCS2D01G493500	Adenosylhomocysteinase
TraesCS2D01G549400	Adenylate kinase
TraesCS2D01G490400	Agmatine coumaroyltransferase-2
TraesCS2D01G490900	Agmatine coumaroyltransferase-2
TraesCS2D01G491100	Agmatine coumaroyltransferase-2
TraesCS2D01G510700	Albino or Glassy Yellow 1
TraesCS2D01G502100	Aldose 1-epimerase family protein
TraesCS2D01G519500	Alpha/beta hydrolase
TraesCS2D01G518900	alpha/beta-Hydrolases superfamily protein
TraesCS2D01G498000	Alpha/beta-Hydrolases superfamily protein, putative
TraesCS2D01G499000	Alpha-1,4-glucan-protein synthase
TraesCS2D01G498900	Alpha-1,4-glucan-protein synthase [UDP-forming]
TraesCS2D01G553900	Alpha-1,4-glucan-protein synthase [UDP-forming]
TraesCS2D01G550400	Alpha-glucosidase
TraesCS2D01G550500	Alpha-glucosidase
TraesCS2D01G550600	Alpha-glucosidase
TraesCS2D01G550700	Alpha-glucosidase
TraesCS2D01G510600	Alpha-N-acetylglucosaminidase
TraesCS2D01G549200	Amine oxidase family protein
TraesCS2D01G549300	Amine oxidase family protein
TraesCS2D01G500000	Amino acid permease
TraesCS2D01G555000	Anamorsin homolog
TraesCS2D01G521200	Angiopoietin-1
TraesCS2D01G498300	Ankyrin repeat family protein
TraesCS2D01G500300	Anthocyanidin reductase
TraesCS2D01G527800	Anthocyanin 5-aromatic acyltransferase
TraesCS2D01G527900	Anthocyanin 5-aromatic acyltransferase
TraesCS2D01G528000	Anthocyanin 5-aromatic acyltransferase
TraesCS2D01G528100	Anthocyanin 5-aromatic acyltransferase
TraesCS2D01G506500	AP2-like ethylene-responsive transcription factor
TraesCS2D01G515800	AP2-like ethylene-responsive transcription factor
TraesCS2D01G553200	Arabinanase/levansucrase/invertase, putative
TraesCS2D01G555300	ARM repeat superfamily protein
TraesCS2D01G555500	ARM repeat superfamily protein
TraesCS2D01G555600	ARM repeat superfamily protein
TraesCS2D01G555800	ARM repeat superfamily protein
TraesCS2D01G492000	ATP synthase subunit alpha
TraesCS2D01G501600	ATP-dependent RNA helicase
TraesCS2D01G553400	ATP-dependent RNA helicase
TraesCS2D01G554300	ATP-dependent RNA helicase
TraesCS2D01G520100	Autophagy-related protein 101
TraesCS2D01G491200	Auxin response factor
TraesCS2D01G548900	Auxin response factor
TraesCS2D01G493800	Auxin responsive SAUR protein
TraesCS2D01G493900	Auxin responsive SAUR protein
TraesCS2D01G494800	Auxin responsive SAUR protein
TraesCS2D01G506900	Auxin-responsive protein
TraesCS2D01G514300	B3 domain protein (DUF313)
TraesCS2D01G514400	B3 domain protein (DUF313)
TraesCS2D01G555100	B3 domain-containing protein
TraesCS2D01G535300	B3 domain-containing protein family
TraesCS2D01G515300	basic helix-loop-helix (bHLH) DNA-binding superfamily protein
TraesCS2D01G539300	basic helix-loop-helix (bHLH) DNA-binding superfamily protein
TraesCS2D01G517000	Basic helix-loop-helix (BHLH) family transcription factor
TraesCS2D01G497500	Basic leucine zipper and W2 domain-containing protein 2
TraesCS2D01G509000	Benzyl alcohol O-benzoyltransferase
TraesCS2D01G547200	beta glucosidase 29
TraesCS2D01G525300	Beta xylosidase
TraesCS2D01G489300	Beta-fructofuranosidase, insoluble isoenzyme 1
TraesCS2D01G489400	Beta-fructofuranosidase, insoluble protein
TraesCS2D01G522600	Beta-glucosidase
TraesCS2D01G522700	Beta-glucosidase
TraesCS2D01G500500	Bifunctional lysine-specific demethylase and histidyl-hydroxylase NO66
TraesCS2D01G556700	binding protein
TraesCS2D01G542900	Blue copper protein
TraesCS2D01G543000	Blue copper protein
TraesCS2D01G543100	Blue copper protein
TraesCS2D01G543300	Blue copper protein
TraesCS2D01G543400	Blue copper protein
TraesCS2D01G543500	Blue copper protein
TraesCS2D01G543600	Blue copper protein
TraesCS2D01G516600	BRCA1-associated protein
TraesCS2D01G496000	BSD domain containing protein
TraesCS2D01G508700	BTB/POZ and MATH domain-containing protein 2
TraesCS2D01G526700	BTB/POZ domain containing protein
TraesCS2D01G526900	BTB/POZ domain containing protein, expressed
TraesCS2D01G543200	BTB/POZ domain containing protein, expressed
TraesCS2D01G544900	BTB/POZ domain containing protein, expressed
TraesCS2D01G507300	BTB/POZ domain-containing protein
TraesCS2D01G529600	BTB/POZ domain-containing protein
TraesCS2D01G555200	BTB/POZ domain-containing protein
TraesCS2D01G544500	BTB/POZ/MATH-domain protein
TraesCS2D01G544700	BTB/POZ/MATH-domain protein
TraesCS2D01G500200	BTB-POZ and MATH domain protein
TraesCS2D01G501800	C2 domain-containing protein
TraesCS2D01G529500	C6HC-type zinc finger RING/U-box protein
TraesCS2D01G534300	Calcium-binding mitochondrial carrier protein SCaMC-1
TraesCS2D01G546500	Calreticulin-like protein
TraesCS2D01G490000	Carboxypeptidase
TraesCS2D01G556200	CASP-like protein
TraesCS2D01G556800	CASP-like protein
TraesCS2D01G558000	CASP-like protein
TraesCS2D01G523600	Cation/H(+) antiporter
TraesCS2D01G533300	Cellular nucleic acid-binding protein
TraesCS2D01G532800	Cellulose synthase-like protein
TraesCS2D01G530600	Chalcone synthase
TraesCS2D01G498200	Chaperone protein DnaJ
TraesCS2D01G526800	Chaperone protein DnaJ
TraesCS2D01G557300	Chaperone protein DnaJ
TraesCS2D01G519000	Chloride channel protein
TraesCS2D01G553700	Chromatin structure-remodeling complex protein SYD
TraesCS2D01G554000	Chromatin structure-remodeling complex protein SYD
TraesCS2D01G554700	Chromatin structure-remodeling complex protein SYD
TraesCS2D01G500800	Clavata3/ESR (CLE) gene family member
TraesCS2D01G518700	Clustered mitochondria protein
TraesCS2D01G556900	CoA ligase
TraesCS2D01G512600	cofactor assembly of complex C
TraesCS2D01G515400	Collagen alpha-3(VI) chain
TraesCS2D01G505300	COP9 signalosome complex subunit 5
TraesCS2D01G537200	Copalyl diphosphate synthase
TraesCS2D01G548500	Cortactin-binding protein 2
TraesCS2D01G516200	Crossover junction endonuclease EME1B
TraesCS2D01G516300	Crossover junction endonuclease EME1B
TraesCS2D01G499400	CsAtPR5
TraesCS2D01G501000	CsAtPR5
TraesCS2D01G501100	CsAtPR5
TraesCS2D01G501200	CsAtPR5
TraesCS2D01G503700	CsAtPR5
TraesCS2D01G503800	CsAtPR5
TraesCS2D01G519300	CsAtPR5
TraesCS2D01G551100	CsAtPR5
TraesCS2D01G536000	CsAtPR5, putative, expressed
TraesCS2D01G522400	Cullin family protein
TraesCS2D01G520900	Cyclic nucleotide-gated channel
TraesCS2D01G517300	cyclin-D1-binding protein
TraesCS2D01G496400	Cyclin-related family protein
TraesCS2D01G514700	Cyclopropane-fatty-acyl-phospholipid synthase
TraesCS2D01G545500	Cyclopropane-fatty-acyl-phospholipid synthase
TraesCS2D01G545700	Cyclopropane-fatty-acyl-phospholipid synthase
TraesCS2D01G545800	Cyclopropane-fatty-acyl-phospholipid synthase
TraesCS2D01G545900	Cyclopropane-fatty-acyl-phospholipid synthase
TraesCS2D01G513600	Cysteine protease
TraesCS2D01G517800	Cysteine protease
TraesCS2D01G542000	Cysteine protease
TraesCS2D01G544800	Cysteine protease
TraesCS2D01G542200	Cysteine protease, putative
TraesCS2D01G551500	Cysteine protease, putative
TraesCS2D01G539200	Cysteine proteinase
TraesCS2D01G546600	Cysteine proteinase
TraesCS2D01G547600	Cysteine proteinase
TraesCS2D01G547800	Cysteine proteinase
TraesCS2D01G493200	Cysteine/histidine-rich C1 domain protein
TraesCS2D01G515200	Cytochrome b/b6 protein
TraesCS2D01G513000	Cytochrome b559 subunit alpha
TraesCS2D01G553800	Cytochrome b559 subunit alpha
TraesCS2D01G535700	Cytochrome P450
TraesCS2D01G546900	Cytochrome P450
TraesCS2D01G490500	Cytochrome P450 family protein
TraesCS2D01G491000	Cytochrome P450 family protein
TraesCS2D01G521700	Cytochrome P450 family protein, expressed
TraesCS2D01G521800	Cytochrome P450 family protein, expressed
TraesCS2D01G531900	Cytochrome P450 family protein, expressed
TraesCS2D01G535800	Cytochrome P450 family protein, expressed
TraesCS2D01G547400	Cytochrome P450 family protein, expressed
TraesCS2D01G547500	Cytochrome P450 family protein, expressed
TraesCS2D01G547700	Cytochrome P450 family protein, expressed
TraesCS2D01G548700	Cytochrome P450, putative
TraesCS2D01G505600	Cytochrome P450-like
TraesCS2D01G524100	Diacylglycerol acyltransferase/mycolyltransferase Ag85C
TraesCS2D01G534600	Diacylglycerol kinase
TraesCS2D01G515000	dicer-like 3
TraesCS2D01G503500	Disease resistance protein (NBS-LRR class) family
TraesCS2D01G511600	Disease resistance protein (NBS-LRR class) family
TraesCS2D01G511700	Disease resistance protein (NBS-LRR class) family
TraesCS2D01G530200	Disease resistance protein (NBS-LRR class) family
TraesCS2D01G549600	Disease resistance protein (NBS-LRR class) family
TraesCS2D01G549700	Disease resistance protein (NBS-LRR class) family
TraesCS2D01G541000	Disease resistance protein RPM1
TraesCS2D01G528800	DNA polymerase I
TraesCS2D01G522300	DNA topoisomerase
TraesCS2D01G526400	DNA topoisomerase
TraesCS2D01G514100	DNA topoisomerase 2
TraesCS2D01G524500	DNA-directed RNA polymerase subunit beta
TraesCS2D01G531600	Double-strand break repair protein MRE11
TraesCS2D01G531100	Double-stranded RNA-specific editase B2
TraesCS2D01G499700	DUF1365 family protein
TraesCS2D01G521000	DUF674 family protein
TraesCS2D01G521100	DUF674 family protein
TraesCS2D01G535200	E3 ubiquitin-protein ligase MYCBP2
TraesCS2D01G518100	EamA-like transporter family
TraesCS2D01G525900	Early light-induced protein 2, chloroplastic
TraesCS2D01G552300	Early nodulin-like protein
TraesCS2D01G514600	egg cell-secreted-like protein (DUF1278)
TraesCS2D01G544000	EH domain-containing protein 1
TraesCS2D01G540900	ELMO domain containing protein
TraesCS2D01G510500	Endo-1,4-beta-xylanase
TraesCS2D01G557500	Endoglucanase
TraesCS2D01G527400	Endonuclease MutS2
TraesCS2D01G492900	Endoribonuclease YbeY
TraesCS2D01G528900	Epidermal patterning factor
TraesCS2D01G529300	Epoxide hydrolase 2
TraesCS2D01G503100	Ethylene-responsive transcription factor
TraesCS2D01G503900	Ethylene-responsive transcription factor
TraesCS2D01G515900	Ethylene-responsive transcription factor
TraesCS2D01G543900	Ethylene-responsive transcription factor, putative
TraesCS2D01G496100	Eukaryotic translation initiation factor 3 subunit F
TraesCS2D01G534900	Exocyst complex component, putative
TraesCS2D01G535000	Exocyst complex component, putative
TraesCS2D01G539000	Exocyst complex component, putative
TraesCS2D01G542300	Exocyst complex component, putative
TraesCS2D01G542500	Exocyst complex component, putative
TraesCS2D01G542400	Exocyst complex protein EXO70
TraesCS2D01G548000	Exostosin family protein
TraesCS2D01G544100	F12F1.11
TraesCS2D01G491500	Facilitated trehalose transporter Tret1
TraesCS2D01G543700	FAD-binding Berberine family protein, putative
TraesCS2D01G502400	Farnesyl pyrophosphate synthase
TraesCS2D01G489800	FBD-associated F-box protein
TraesCS2D01G524300	F-box domain containing protein
TraesCS2D01G553500	F-box domain containing protein
TraesCS2D01G553600	F-box domain containing protein
TraesCS2D01G554100	F-box domain containing protein
TraesCS2D01G554200	F-box domain containing protein
TraesCS2D01G489500	F-box family protein
TraesCS2D01G489600	F-box family protein
TraesCS2D01G490200	F-box family protein
TraesCS2D01G508500	F-box family protein
TraesCS2D01G510900	F-box family protein
TraesCS2D01G517900	F-box family protein
TraesCS2D01G518000	F-box family protein
TraesCS2D01G524600	F-box family protein
TraesCS2D01G524700	F-box family protein
TraesCS2D01G541100	F-box family protein
TraesCS2D01G541700	F-box family protein
TraesCS2D01G554600	F-box family protein
TraesCS2D01G492500	F-box protein
TraesCS2D01G520600	F-box protein
TraesCS2D01G524800	F-box protein
TraesCS2D01G525100	F-box protein
TraesCS2D01G556400	F-box protein
TraesCS2D01G517400	F-box/LRR-repeat protein 17
TraesCS2D01G513400	F-box/RNI-like superfamily protein
TraesCS2D01G515700	Filament-like plant protein
TraesCS2D01G493400	Flavanone 3-hydroxylase
TraesCS2D01G535100	Flavin-containing monooxygenase
TraesCS2D01G504100	Flavonoid 3'-hydroxylase
TraesCS2D01G538000	Flowering Locus T-like protein, putative
TraesCS2D01G538100	Flowering Locus T-like protein, putative
TraesCS2D01G513100	GDSL esterase/lipase
TraesCS2D01G513300	GDSL esterase/lipase
TraesCS2D01G491800	general regulatory factor 8
TraesCS2D01G542100	Gibberellin 3-beta-hydroxylase 2
TraesCS2D01G513800	glucuronoxylan 4-O-methyltransferase-like protein (DUF579)
TraesCS2D01G514000	Glutamate dehydrogenase
TraesCS2D01G500600	Glutamine synthetase
TraesCS2D01G521500	Glutamyl-tRNA(Gln) amidotransferase subunit A
TraesCS2D01G523500	Glutaredoxin
TraesCS2D01G503200	Glutathione S-transferase
TraesCS2D01G504900	Glutathione S-transferase
TraesCS2D01G545400	Glutathione S-transferase
TraesCS2D01G546700	Glutathione S-transferase alpha-5
TraesCS2D01G517200	Glycerol kinase
TraesCS2D01G548400	Glycerol-3-phosphate dehydrogenase [NAD(+)]
TraesCS2D01G531200	Glycine dehydrogenase (decarboxylating)
TraesCS2D01G515500	Glycine rich protein
TraesCS2D01G504600	Glycosyltransferase
TraesCS2D01G512800	Glycosyltransferases
TraesCS2D01G508600	Golgin candidate 2
TraesCS2D01G534700	GRAS transcription factor
TraesCS2D01G493300	GRF zinc finger family protein
TraesCS2D01G547000	GRF zinc finger family protein, expressed
TraesCS2D01G490300	GrpE protein homolog
TraesCS2D01G493100	GTP cyclohydrolase 1
TraesCS2D01G520200	Harbinger transposase-derived nuclease
TraesCS2D01G526300	HAUS augmin-like complex subunit 3
TraesCS2D01G497900	Heavy metal transport/detoxification superfamily protein
TraesCS2D01G519100	Heavy metal transport/detoxification superfamily protein
TraesCS2D01G539800	Heavy metal transport/detoxification superfamily protein
TraesCS2D01G539900	Heavy metal transport/detoxification superfamily protein
TraesCS2D01G540000	Heavy metal transport/detoxification superfamily protein
TraesCS2D01G540100	Heavy metal transport/detoxification superfamily protein
TraesCS2D01G540300	Heavy metal transport/detoxification superfamily protein
TraesCS2D01G540400	Heavy metal transport/detoxification superfamily protein
TraesCS2D01G540500	Heavy metal transport/detoxification superfamily protein
TraesCS2D01G540600	Heavy metal transport/detoxification superfamily protein
TraesCS2D01G540700	Heavy metal transport/detoxification superfamily protein
TraesCS2D01G541200	Heavy metal transport/detoxification superfamily protein
TraesCS2D01G536200	Heme oxygenase 1
TraesCS2D01G531500	Heterogeneous nuclear ribonucleoprotein U-like protein 1
TraesCS2D01G530400	Hexosyltransferase
TraesCS2D01G532700	Histidine--tRNA ligase
TraesCS2D01G552000	Histone H2A deubiquitinase (DUF3755)
TraesCS2D01G519200	Holliday junction ATP-dependent DNA helicase RuvA
TraesCS2D01G505500	Homeodomain-like superfamily protein
TraesCS2D01G556300	HXXXD-type acyl-transferase family protein
TraesCS2D01G536100	Invertase inhibitor
TraesCS2D01G492600	IQ domain-containing protein
TraesCS2D01G511800	Isoaspartyl peptidase/L-asparaginase
TraesCS2D01G511900	Isoaspartyl peptidase/L-asparaginase
TraesCS2D01G512000	Isoaspartyl peptidase/L-asparaginase
TraesCS2D01G512100	Isoaspartyl peptidase/L-asparaginase
TraesCS2D01G540800	Isoflavone reductase-like protein
TraesCS2D01G507200	Jasmonate ZIM domain-containing protein
TraesCS2D01G506000	Kaurene synthase
TraesCS2D01G499800	Kelch repeat-containing protein
TraesCS2D01G503300	Kinase family protein
TraesCS2D01G510400	Kinase family protein
TraesCS2D01G525600	Kinase superfamily protein
TraesCS2D01G508900	Kinase, putative
TraesCS2D01G509200	Kinase, putative
TraesCS2D01G511100	Kinase, putative
TraesCS2D01G511300	Kinase, putative
TraesCS2D01G502500	Kinase-like
TraesCS2D01G513200	Kinase-like protein
TraesCS2D01G536600	Kinase-like protein
TraesCS2D01G542800	Late embryogenesis abundant (LEA) hydroxyproline-rich glycoprotein family
TraesCS2D01G550200	Lecithin-cholesterol acyltransferase-like 1
TraesCS2D01G551600	Leucine-rich repeat receptor-like protein kinase
TraesCS2D01G551700	Leucine-rich repeat receptor-like protein kinase
TraesCS2D01G551800	Leucine-rich repeat receptor-like protein kinase
TraesCS2D01G545100	Leucine-rich repeat receptor-like protein kinase family
TraesCS2D01G490100	Leucine-rich repeat receptor-like protein kinase family protein
TraesCS2D01G516700	Leucine-rich repeat receptor-like protein kinase family protein
TraesCS2D01G516800	Leucine-rich repeat receptor-like protein kinase family protein
TraesCS2D01G516900	Leucine-rich repeat receptor-like protein kinase family protein
TraesCS2D01G517100	Leucine-rich repeat receptor-like protein kinase family protein
TraesCS2D01G523800	LIGHT-DEPENDENT SHORT HYPOCOTYLS-like protein (DUF640)
TraesCS2D01G522100	Light-independent protochlorophyllide reductase iron-sulfur ATP-binding protein
TraesCS2D01G502300	Lipase
TraesCS2D01G510800	Lipid transfer protein
TraesCS2D01G536300	Lipid transfer protein
TraesCS2D01G506700	Lipoate-protein ligase A
TraesCS2D01G528400	Lipoxygenase
TraesCS2D01G528500	Lipoxygenase
TraesCS2D01G525000	Loricrin-like protein
TraesCS2D01G552600	LOW protein: nuclease-like protein
TraesCS2D01G529700	MADS-box transcription factor 8
TraesCS2D01G512400	Malate synthase G
TraesCS2D01G525800	Malate synthase G
TraesCS2D01G546000	MAP7 domain-containing protein 1
TraesCS2D01G535400	Matrix metalloproteinase
TraesCS2D01G524900	mechanosensitive channel of small conductance-like 9
TraesCS2D01G513700	mediator of RNA polymerase II transcription subunit
TraesCS2D01G494900	Mediator of RNA polymerase II transcription subunit 13
TraesCS2D01G496200	Mediator of RNA polymerase II transcription subunit 7
TraesCS2D01G545000	Methylthioribose kinase
TraesCS2D01G529900	Methylthioribose-1-phosphate isomerase
TraesCS2D01G518400	Methyltransferase-like protein
TraesCS2D01G529400	MICOS complex subunit MIC60
TraesCS2D01G530300	Micronuclear linker histone polyprotein-like protein
TraesCS2D01G554500	Microtubule-associated protein 70-2
TraesCS2D01G523000	Microtubule-associated protein RP/EB family member
TraesCS2D01G514500	microtubule-associated proteins 70-3
TraesCS2D01G516100	Mitochondrial glycoprotein
TraesCS2D01G528700	Mitochondrial transcription termination factor family protein
TraesCS2D01G496500	Molybdate transporter 2
TraesCS2D01G497400	Molybdopterin biosynthesis protein CNX1
TraesCS2D01G543800	Myb/SANT-like DNA-binding domain protein
TraesCS2D01G497800	Myosin-H heavy chain
TraesCS2D01G557200	NAD(P)H-quinone oxidoreductase subunit 6, chloroplastic
TraesCS2D01G557100	NADH-quinone oxidoreductase subunit H 1
TraesCS2D01G506600	NADPH--cytochrome P450 reductase
TraesCS2D01G531800	N-alpha-acetyltransferase
TraesCS2D01G510000	NBS-LRR disease resistance protein
TraesCS2D01G510100	NBS-LRR disease resistance protein
TraesCS2D01G510300	NBS-LRR disease resistance protein
TraesCS2D01G504500	NBS-LRR disease resistance protein, putative, expressed
TraesCS2D01G495900	NBS-LRR-like resistance protein
TraesCS2D01G545300	NBS-LRR-like resistance protein
TraesCS2D01G545600	NBS-LRR-like resistance protein
TraesCS2D01G519800	NEDD8 ultimate buster 1
TraesCS2D01G538800	Non-specific ribonucleoside hydrolase RihC
TraesCS2D01G537400	Non-specific serine/threonine protein kinase
TraesCS2D01G537600	Non-specific serine/threonine protein kinase
TraesCS2D01G504000	Nuclear pore complex protein NUP1
TraesCS2D01G507500	Nuclease
TraesCS2D01G507700	Nuclease S1
TraesCS2D01G507800	Nuclease S1
TraesCS2D01G507900	Nuclease S1
TraesCS2D01G508100	Nuclease S1
TraesCS2D01G508400	Nuclease S1
TraesCS2D01G530000	Nuclease S1
TraesCS2D01G557600	O-methyltransferase-like protein
TraesCS2D01G546400	OTU domain-containing protein, putative
TraesCS2D01G492800	Oxidative stress 3, putative isoform 2
TraesCS2D01G522500	Pathogenesis-related (PR)-10-related norcoclaurine synthase-like protein
TraesCS2D01G552100	Pathogenesis-related protein PR-4
TraesCS2D01G519900	Pectin methylesterase inhibitor
TraesCS2D01G523700	Pectinesterase
TraesCS2D01G524000	Pectinesterase
TraesCS2D01G497000	Pentatricopeptide repeat-containing protein
TraesCS2D01G520400	Pentatricopeptide repeat-containing protein
TraesCS2D01G520800	Pentatricopeptide repeat-containing protein
TraesCS2D01G527300	Pentatricopeptide repeat-containing protein
TraesCS2D01G532100	Pentatricopeptide repeat-containing protein
TraesCS2D01G532200	Pentatricopeptide repeat-containing protein
TraesCS2D01G532300	Pentatricopeptide repeat-containing protein
TraesCS2D01G532400	Pentatricopeptide repeat-containing protein
TraesCS2D01G532500	Pentatricopeptide repeat-containing protein
TraesCS2D01G532600	Pentatricopeptide repeat-containing protein
TraesCS2D01G533000	Pentatricopeptide repeat-containing protein
TraesCS2D01G551900	Pentatricopeptide repeat-containing protein
TraesCS2D01G552500	Pentatricopeptide repeat-containing protein
TraesCS2D01G553100	Pentatricopeptide repeat-containing protein
TraesCS2D01G553300	Pentatricopeptide repeat-containing protein
TraesCS2D01G491900	Peptide chain release factor 3
TraesCS2D01G491300	Peptidyl-prolyl cis-trans isomerase
TraesCS2D01G534000	Peptidyl-prolyl cis-trans isomerase FKBP17-3, chloroplastic
TraesCS2D01G548800	Peptidyl-tRNA hydrolase
TraesCS2D01G550300	Peptidyl-tRNA hydrolase
TraesCS2D01G507600	Peptidyl-tRNA hydrolase, putative
TraesCS2D01G502600	Peroxidase
TraesCS2D01G509700	Peroxidase
TraesCS2D01G511200	Peroxidase
TraesCS2D01G529200	pesticidal crystal cry8Ba protein
TraesCS2D01G496900	pfkB-like carbohydrate kinase family protein
TraesCS2D01G492300	PHD finger-like domain-containing protein 5A
TraesCS2D01G528600	Phosphate carrier protein, mitochondrial
TraesCS2D01G541800	Phosphatidylinositol 4-kinase
TraesCS2D01G546200	Phosphatidylinositol-4-phosphate 5-kinase family protein
TraesCS2D01G504700	phospholipase D beta 1
TraesCS2D01G500700	Phospho-N-acetylmuramoyl-pentapeptide-transferase
TraesCS2D01G549100	Phosphoribosylformylglycinamidine synthase subunit PurQ
TraesCS2D01G540200	Photosystem II reaction center protein L
TraesCS2D01G507400	Phototropic-responsive NPH3 family protein
TraesCS2D01G547900	Phytol kinase
TraesCS2D01G546100	Piwi-like protein 2
TraesCS2D01G503000	Plasma membrane ATPase
TraesCS2D01G492100	plasma membrane H+-ATPase
TraesCS2D01G496600	PLATZ transcription factor family protein
TraesCS2D01G496700	PLATZ transcription factor family protein
TraesCS2D01G491400	Pleiotropic drug resistance protein
TraesCS2D01G539500	P-loop containing nucleoside triphosphate hydrolases superfamily protein
TraesCS2D01G548300	Polyadenylate-binding protein 1-B-binding protein
TraesCS2D01G532900	Polynucleotidyl transferase, ribonuclease H-like superfamily protein
TraesCS2D01G527000	Post-GPI attachment to proteins factor 3
TraesCS2D01G522800	PP2A regulatory subunit TAP46
TraesCS2D01G522900	PP2A regulatory subunit TAP46
TraesCS2D01G537000	Pre-mRNA-splicing factor SYF2
TraesCS2D01G525200	Programmed cell death protein 2-like protein
TraesCS2D01G519700	Protease inhibitor/seed storage/lipid transfer protein
TraesCS2D01G552700	Protein BPS1, chloroplastic-like protein
TraesCS2D01G501300	Protein FAR1-RELATED SEQUENCE 3
TraesCS2D01G493700	Protein kinase
TraesCS2D01G498100	Protein kinase
TraesCS2D01G528200	Protein kinase
TraesCS2D01G534800	Protein kinase
TraesCS2D01G503400	Protein kinase family protein
TraesCS2D01G509400	Protein kinase family protein
TraesCS2D01G509500	Protein kinase family protein
TraesCS2D01G550900	Protein kinase family protein
TraesCS2D01G551000	Protein kinase superfamily protein
TraesCS2D01G499100	Protein kinase-like
TraesCS2D01G511500	Protein kinase-like
TraesCS2D01G503600	Protein MID1-COMPLEMENTING ACTIVITY 1
TraesCS2D01G527500	Protein MIZU-KUSSEI 1
TraesCS2D01G499500	Protein pelota homolog
TraesCS2D01G500400	Protein phosphatase 2C
TraesCS2D01G527700	Protein TIC 214
TraesCS2D01G490600	Protein transport SEC13-like protein
TraesCS2D01G497100	Protein UXT-like protein
TraesCS2D01G506800	Purple acid phosphatase
TraesCS2D01G544400	Purple acid phosphatase
TraesCS2D01G526600	Pyruvate dehydrogenase E1 component subunit alpha, mitochondrial
TraesCS2D01G504800	Rac-like GTP binding protein
TraesCS2D01G557700	Rapid alkalinization factor 2
TraesCS2D01G551200	Receptor kinase
TraesCS2D01G513900	Receptor protein kinase, putative
TraesCS2D01G496300	Receptor-kinase, putative
TraesCS2D01G504300	Receptor-like kinase
TraesCS2D01G504400	Receptor-like kinase
TraesCS2D01G505400	Receptor-like kinase
TraesCS2D01G511400	Receptor-like kinase
TraesCS2D01G530700	Receptor-like kinase
TraesCS2D01G530900	Receptor-like kinase
TraesCS2D01G554400	Receptor-like kinase
TraesCS2D01G491600	Receptor-like protein kinase
TraesCS2D01G500900	Receptor-like protein kinase
TraesCS2D01G509100	Receptor-like protein kinase
TraesCS2D01G509800	Receptor-like protein kinase, putative
TraesCS2D01G492700	Regulator of chromosome condensation (RCC1) family protein
TraesCS2D01G514800	Regulator of G-protein signaling 6
TraesCS2D01G541500	Regulatory protein recX
TraesCS2D01G552200	Response regulator
TraesCS2D01G545200	Reticulon-like protein
TraesCS2D01G510200	Retrotransposon protein, putative, unclassified
TraesCS2D01G523900	Retrotransposon protein, putative, unclassified
TraesCS2D01G526100	Rho GTPase activating protein with PAK-box/P21-Rho-binding domain-containing protein
TraesCS2D01G495800	Ribosomal protein S4
TraesCS2D01G555900	Ribosomal RNA large subunit methyltransferase H
TraesCS2D01G501400	Ribosomal RNA processing protein 1-like protein
TraesCS2D01G496800	Ribosomal RNA small subunit methyltransferase H
TraesCS2D01G501700	Ribulose bisphosphate carboxylase/oxygenase activase
TraesCS2D01G501500	RING/U-box superfamily protein
TraesCS2D01G512300	RING/U-box superfamily protein
TraesCS2D01G512500	RING/U-box superfamily protein
TraesCS2D01G516000	RING/U-box superfamily protein
TraesCS2D01G516500	RING/U-box superfamily protein
TraesCS2D01G522200	RING/U-box superfamily protein
TraesCS2D01G529800	RING/U-box superfamily protein
TraesCS2D01G537500	RING/U-box superfamily protein
TraesCS2D01G547100	RING/U-box superfamily protein
TraesCS2D01G547300	RING/U-box superfamily protein
TraesCS2D01G550100	RING/U-box superfamily protein
TraesCS2D01G523400	RNA binding protein
TraesCS2D01G529100	RNA binding protein
TraesCS2D01G520700	root meristem growth factor
TraesCS2D01G518500	ROP interacting CRIB motif protein
TraesCS2D01G557400	Sacsin
TraesCS2D01G554900	S-acyltransferase
TraesCS2D01G494200	SAUR-like auxin-responsive family protein
TraesCS2D01G494000	SAUR-like auxin-responsive protein family
TraesCS2D01G494100	SAUR-like auxin-responsive protein family
TraesCS2D01G494300	SAUR-like auxin-responsive protein family
TraesCS2D01G494400	SAUR-like auxin-responsive protein family
TraesCS2D01G494500	SAUR-like auxin-responsive protein family
TraesCS2D01G494600	SAUR-like auxin-responsive protein family
TraesCS2D01G495100	SAUR-like auxin-responsive protein family
TraesCS2D01G495200	SAUR-like auxin-responsive protein family
TraesCS2D01G495300	SAUR-like auxin-responsive protein family
TraesCS2D01G495400	SAUR-like auxin-responsive protein family
TraesCS2D01G495500	SAUR-like auxin-responsive protein family
TraesCS2D01G500100	Sec14p-like phosphatidylinositol transfer family protein
TraesCS2D01G506400	Sec14p-like phosphatidylinositol transfer family protein
TraesCS2D01G493600	Serine hydroxymethyltransferase
TraesCS2D01G530100	Serine hydroxymethyltransferase
TraesCS2D01G531400	Serine protease htra2, putative
TraesCS2D01G505200	Serine/threonine-protein kinase
TraesCS2D01G505900	Serine/threonine-protein kinase
TraesCS2D01G512900	Serine/threonine-protein kinase
TraesCS2D01G527600	Serine/threonine-protein kinase
TraesCS2D01G534400	Serine/threonine-protein kinase
TraesCS2D01G535600	Serine/threonine-protein kinase
TraesCS2D01G535900	Serine/threonine-protein kinase
TraesCS2D01G536400	Serine/threonine-protein kinase
TraesCS2D01G536500	Serine/threonine-protein kinase
TraesCS2D01G536900	Serine/threonine-protein kinase
TraesCS2D01G537100	Serine/threonine-protein kinase
TraesCS2D01G537700	Serine/threonine-protein kinase
TraesCS2D01G537800	Serine/threonine-protein kinase
TraesCS2D01G537900	Serine/threonine-protein kinase
TraesCS2D01G538200	Serine/threonine-protein kinase
TraesCS2D01G538400	Serine/threonine-protein kinase
TraesCS2D01G538500	Serine/threonine-protein kinase
TraesCS2D01G538900	Serine/threonine-protein kinase
TraesCS2D01G539100	Serine/threonine-protein kinase
TraesCS2D01G546800	Serine/threonine-protein kinase
TraesCS2D01G548600	Serine/threonine-protein kinase
TraesCS2D01G527100	Serine/threonine-protein kinase PINK1, mitochondrial
TraesCS2D01G549900	Sh4 homologue protein
TraesCS2D01G525500	Shikimate kinase
TraesCS2D01G517700	Short-chain dehydrogenase/reductase family protein
TraesCS2D01G524400	SKP1-like protein
TraesCS2D01G531700	Small nuclear ribonucleoprotein family protein
TraesCS2D01G512200	Small RNA degrading nuclease
TraesCS2D01G495600	Small ubiquitin-related modifier
TraesCS2D01G519400	SPOC domain / transcription elongation factor S-II protein
TraesCS2D01G551400	squamosa promoter binding protein-like 1
TraesCS2D01G502900	Squamosa promoter-binding-like protein
TraesCS2D01G501900	SsrA-binding
TraesCS2D01G520300	Sterile alpha motif (SAM) domain-containing protein
TraesCS2D01G505000	Subtilisin-like protease
TraesCS2D01G505100	Subtilisin-like protease
TraesCS2D01G505700	Sucrose transporter
TraesCS2D01G508800	Sulfate transporter
TraesCS2D01G538600	Sulfotransferase
TraesCS2D01G538700	Sulfotransferase
TraesCS2D01G538300	Superoxide dismutase
TraesCS2D01G518800	Synaptotagmin-5
TraesCS2D01G494700	Ta11-like non-LTR retrotransposon
TraesCS2D01G499900	Ta11-like non-LTR retrotransposon
TraesCS2D01G552800	Tetratricopeptide repeat
TraesCS2D01G525400	Tetratricopeptide repeat (TPR)-like superfamily protein
TraesCS2D01G541900	Thiol-disulfide oxidoreductase DCC
TraesCS2D01G520000	Thymidylate synthase
TraesCS2D01G491700	TLD domain-containing protein
TraesCS2D01G531300	Topless-related 1-like protein
TraesCS2D01G495700	Transcription factor
TraesCS2D01G536700	Transcription factor
TraesCS2D01G536800	Transcription factor
TraesCS2D01G523200	Transcription factor protein
TraesCS2D01G523300	Transcription factor protein
TraesCS2D01G526000	Transcription factor, MADS-box
TraesCS2D01G526200	Transcription factor, MADS-box
TraesCS2D01G499200	Transcription factor, putative
TraesCS2D01G529000	transcription factor-like protein
TraesCS2D01G502000	Transcriptional adapter 1
TraesCS2D01G525700	translation initiation factor 3 subunit I
TraesCS2D01G497200	Transmembrane 9 superfamily member
TraesCS2D01G520500	Transmembrane protein
TraesCS2D01G516400	Transmembrane protein, putative
TraesCS2D01G517500	transmembrane protein, putative (DUF247)
TraesCS2D01G549500	transmembrane protein, putative (DUF594)
TraesCS2D01G549800	transmembrane protein, putative (DUF594)
TraesCS2D01G555700	transmembrane protein, putative (DUF594)
TraesCS2D01G502800	Transposon protein, putative, CACTA, En/Spm sub-class
TraesCS2D01G515100	Transposon protein, putative, mutator sub-class
TraesCS2D01G522000	Transposon protein, putative, Mutator sub-class
TraesCS2D01G530500	Transposon protein, putative, Mutator sub-class
TraesCS2D01G535500	Transposon protein, putative, Mutator sub-class
TraesCS2D01G521900	Transposon protein, putative, Mutator sub-class, expressed
TraesCS2D01G542700	Triacylglycerol lipase 2, putative
TraesCS2D01G514200	trithorax-like protein 2
TraesCS2D01G550800	tRNA 2-thiocytidine biosynthesis protein TtcA
TraesCS2D01G537300	tRNA-2-methylthio-N(6)-dimethylallyladenosine synthase
TraesCS2D01G497300	Tropinone reductase-like protein
TraesCS2D01G518200	Tryptophan decarboxylase
TraesCS2D01G518300	Tryptophan decarboxylase
TraesCS2D01G509900	TSL-kinase interacting protein 1
TraesCS2D01G492200	U11/U12 small nuclear ribonucleoprotein 25 kDa
TraesCS2D01G542600	Ubiquinol oxidase
TraesCS2D01G552900	Ubiquinone biosynthesis protein COQ4 homolog, mitochondrial
TraesCS2D01G499600	Ubiquinone/menaquinone biosynthesis C-methyltransferase UbiE
TraesCS2D01G517600	Ubiquitin carboxyl-terminal hydrolase
TraesCS2D01G539700	Ubiquitin carboxyl-terminal hydrolase
TraesCS2D01G541400	Ubiquitin-conjugating enzyme E2
TraesCS2D01G550000	UBX domain-containing protein
TraesCS2D01G504200	UDP-glycosyltransferase
TraesCS2D01G512700	UDP-glycosyltransferase
TraesCS2D01G507100	UPF0136 membrane protein
TraesCS2D01G552400	Uracil-DNA glycosylase
TraesCS2D01G507000	Vacuolar cation/proton exchanger, putative
TraesCS2D01G553000	Vacuolar protein sorting-associated protein 41-like protein
TraesCS2D01G518600	VQ motif-containing protein, putative
TraesCS2D01G521600	V-type ATP synthase subunit D
TraesCS2D01G493000	V-type proton ATPase subunit a
TraesCS2D01G511000	Wall-associated receptor kinase 2
TraesCS2D01G509300	wall-associated receptor kinase-like protein
TraesCS2D01G509600	wall-associated receptor kinase-like protein
TraesCS2D01G506100	WAT1-related protein
TraesCS2D01G548100	WAT1-related protein
TraesCS2D01G548200	WAT1-related protein
TraesCS2D01G555400	WAT1-related protein
TraesCS2D01G532000	Wound-responsive family protein
TraesCS2D01G533100	Wound-responsive family protein
TraesCS2D01G533200	Wound-responsive family protein
TraesCS2D01G533400	Wound-responsive family protein
TraesCS2D01G533500	Wound-responsive family protein
TraesCS2D01G533600	Wound-responsive family protein
TraesCS2D01G533700	Wound-responsive family protein
TraesCS2D01G533800	Wound-responsive family protein
TraesCS2D01G533900	Wound-responsive family protein
TraesCS2D01G534100	Wound-responsive family protein
TraesCS2D01G534200	Wound-responsive family protein
TraesCS2D01G534500	Wound-responsive family protein
TraesCS2D01G489700	WRKY transcription factor
TraesCS2D01G497600	WRKY transcription factor
TraesCS2D01G497700	WRKY transcription factor
TraesCS2D01G515600	WUSCHEL-like homeobox protein
TraesCS2D01G498400	Xyloglucan endotransglucosylase/hydrolase
TraesCS2D01G498500	Xyloglucan endotransglucosylase/hydrolase
TraesCS2D01G498600	Xyloglucan endotransglucosylase/hydrolase
TraesCS2D01G498700	Xyloglucan endotransglucosylase/hydrolase
TraesCS2D01G498800	Xyloglucan endotransglucosylase/hydrolase
TraesCS2D01G554800	Yellow stripe-like transporter 12
TraesCS2D01G492400	Zinc finger CCCH domain-containing protein 30
TraesCS2D01G549000	Zinc finger CCCH domain-containing protein 32
TraesCS2D01G514900	Zinc finger C-x8-C-x5-C-x3-H type family protein
TraesCS2D01G526500	Zinc finger C-x8-C-x5-C-x3-H type family protein
TraesCS2D01G490700	Zinc finger matrin-type protein 2
TraesCS2D01G524200	Zinc finger protein 841
TraesCS2D01G551300	Zinc finger protein-like 1 like
TraesCS2D01G506200	Zinc transporter
TraesCS2D01G506300	Zinc transporter
TraesCS2D01G505800	Zn-dependent exopeptidases superfamily protein
